## **Aversion of the invasive Asian longhorned tick to the white-footed mouse, the dominant reservoir of tick-borne pathogens in the United States**

Authors: Isobel Ronai\*, Danielle M. Tufts\*†, and Maria A. Diuk-Wasser

\*These authors contributed equally to this study

†Corresponding author email: [dt2503@columbia.edu](mailto:dt2503@columbia.edu)

Author Affiliation: Columbia University, 1200 Amsterdam Ave, New York, NY 10027

### **Abstract**

The Asian longhorned tick (*Haemaphysalis longicornis*) was reported for the first time in the United States of America in 2017 and has now spread across 12 states. The potential of this invasive tick vector to transmit pathogens will be determined through its association to native hosts, such as the white-footed mouse (*Peromyscus leucopus*) which is the primary reservoir for the causative agent of Lyme disease (*Borrelia burgdorferi*). We placed larval *H. longicornis* on *P. leucopus*, 65% of the larvae moved off the host within a short period of time and none attached. In contrast, larval black-legged ticks (*Ixodes scapularis*) did not move from the site of placement. We then conducted a laboratory behavioural assay to quantify the interaction of *H. longicornis* with *P. leucopus* and other potential mammalian host species. *H. longicornis* larvae were less likely to enter the hair of *P. leucopus* and humans compared to the hair of domestic cats, domestic dogs, and white-tailed deer. Our study identifies a tick-host hair interaction behaviour, which can be quantified in a laboratory assay to predict tick-host associations and provides insights into how ticks select a host.

**Keywords:** *Canis lupus familiaris*; *Felis catus*; *Homo sapiens*; *Odocoileus virginianus*; acquired tick resistance; blacklegged tick; host immunity; host-seeking; hot foot; Ixodidae.

## Introduction

The Asian longhorned tick (*Haemaphysalis longicornis*) transmits numerous human pathogens and is a highly invasive tick species [1]. In the United States of America this species was reported for the first time in 2017 [2], although archival evidence suggests *H. longicornis* has been present in the USA since 2010 [3]. Currently, *H. longicornis* has been detected in 12 states: Arkansas, Connecticut, Delaware, Kentucky, Maryland, New Jersey, New York, North Carolina, Pennsylvania, Tennessee, Virginia and West Virginia [4, 5]. Modelling studies indicate this species has the potential to spread throughout the majority of the USA [6].

As *H. longicornis* establishes and spreads to new ecosystems it encounters new host communities. The host blood meal is critical for not only vector survival and reproduction but also for the pathogens it can acquire and transmit. In the USA, the non-domestic mammalian host community for ticks includes: small mammals (such as white-footed mice and other rodents); medium mammals (such as racoons and opossum); and large mammals (such as deer) [7]. The host species of most importance for public health is the white-footed mouse (*Peromyscus leucopus*), the primary vertebrate reservoir host for zoonotic pathogens, such as the causative agent of Lyme disease (*Borrelia burgdorferi*) [8]. However, larval *H. longicornis* have shown limited association with small rodents compared to medium and large sized mammals, in both its native and invasive ranges [1, 9-11].

Here we investigate the interaction of the invasive *H. longicornis* larvae with *P. leucopus* and other potential mammalian host species commonly encountered in the USA, including humans. The behaviour of *H. longicornis* is also compared to that of the native black-legged tick (*Ixodes scapularis*), the main vector of *B. burgdorferi* and at least six other human pathogens in the USA [12].

## Materials and Methods

### *Ticks*

During fieldwork on Staten Island (New York, USA) in August 2018, we collected three engorged *H. longicornis* adult females from a white-tailed deer (*Odocoileus virginianus*) [11]. The females were maintained in individual vials in an incubator (21°C and 95-100% humidity) and allowed to lay eggs. Larvae emerged from the egg masses 4 months later. The *I. scapularis* larvae were obtained from a laboratory-reared colony through the Centers for Disease prevention and NIH Biodefense and Emerging Infections Research Resources Repository (NIAID, NIH: *I. scapularis* larvae, NR-44115). The larvae were maintained in the same incubator and used in the study within 6 months.

### *Behavioural assessment of responses to live white-footed mouse host*

We placed 10 *H. longicornis* ( $n = 4$  replicates) or 10 *I. scapularis* larvae ( $n = 3$  replicates) in one ear of an anaesthetized mouse. The behaviour of the ticks was observed every 30 seconds for 15 minutes and we noted the duration of time the ticks took to: (i) move from the site of placement; and (ii) drop off the mouse. To investigate whether the remaining *H. longicornis* would feed to repletion they were left on the mice. Individual mice were housed in single cages positioned over water. The mice cages were inspected daily for any engorged larvae and the number of recovered larvae recorded. All animal procedures were in accordance with

guidelines approved by the Columbia University Institutional Animal Care and Use Committee (IACUC), protocol number: AC-AAAY2450.

### ***Behavioural arena assay of interaction with potential native hosts***

Hair was removed from frozen white-footed mouse (*P. leucopus*), domestic cat (*Felis catus*), domestic dog (*Canis lupus familiaris*), white-tailed deer, and a human (*Homo sapiens*). None of the animals were treated with flea or tick repellent. The human hair was obtained from the head of one of the researchers (DMT) and was not dyed or treated with any chemicals. Petri dishes were used as behavioural arenas and the dish was divided into three areas (hair zone, non-hair zone and centre line) (figure 1). The hair was arranged in the hair zone and a new Petri dish was used for each hair treatment to prevent scent cross-contamination. At time zero, we placed *H. longicornis* or *I. scapularis* larvae ( $n = 10$ , 3 replicates) on the centre line. Any tick that moved to the rim of the Petri dish was relocated to the base of the dish.

To assess the behaviour of the ticks when encountering host hair, each trial of the behavioural assay was video recorded. The videos were analysed by two double-blinded observers. The main behavioural response of the ticks was an interaction with the hair interface (dotted line in figure 1). We counted the number of times a tick interacted with the hair interface and report the frequency of interactions per tick per minute. Note that a tick sometimes interacted with the hair interface multiple times. We then recorded the resulting interaction, the tick either: (i) entered the hair zone (supplementary material, movie 1); or (ii) turned away from the hair interface (supplementary material, movie 2).

### ***Statistical analysis***

We conducted all statistical analyses using R. The effect of tick species and host hair treatment on the number of times a tick interacted with the hair interface was examined using a non-parametric Kruskal-Wallis test. The resulting decision (entered or turned away from hair interface) given an interaction was assessed using a generalised linear mixed model (GLMM) fit by maximum likelihood (Laplace approximation) with observer and replicate as random effects (R package lme4). A GLMM model was performed to compare the interaction behaviour between the two species of tick and then separate analyses were performed for each tick species to compare the probability of entering the hair zone of different hosts to that of the white-footed mouse (reference category). Lastly, a student's t-test was used to compare the overall duration spent in the hair zone by *H. longicornis* and *I. scapularis*.

## **Results**

Within a 15-minute timeframe after placement on live white-footed mice, 67.5% of the *H. longicornis* ( $n = 40$ ) moved from the site of placement, whereas 0% of the *I. scapularis* ( $n = 40$ ) moved (supplementary material, figure S1a). In addition, 55% of the *H. longicornis* ( $n = 40$ ) dropped off the mice, whereas 0% of *I. scapularis* ( $n = 40$ ) dropped off (supplementary material, figure S1b). Before we relocated the mice to a cage, an additional four *H. longicornis* dropped off, therefore, 65% of *H. longicornis* ( $n = 40$ ) dropped off the mice. No engorged larvae of the remaining *H. longicornis* on the mice ( $n = 14$ ) were recovered.

The frequency of interactions with the hair interface were similar for *H. longicornis* and *I. scapularis* (Kruskal-Wallis: 0.367,  $p = 0.5448$ ; supplementary material, figure S2). There was also no significant effect of hair treatment (Kruskal-Wallis: 4.283,  $p = 0.3691$ ; supplementary material, figure 2). Therefore, *H. longicornis* interacted as frequently with the hair treatments as *I. scapularis*.

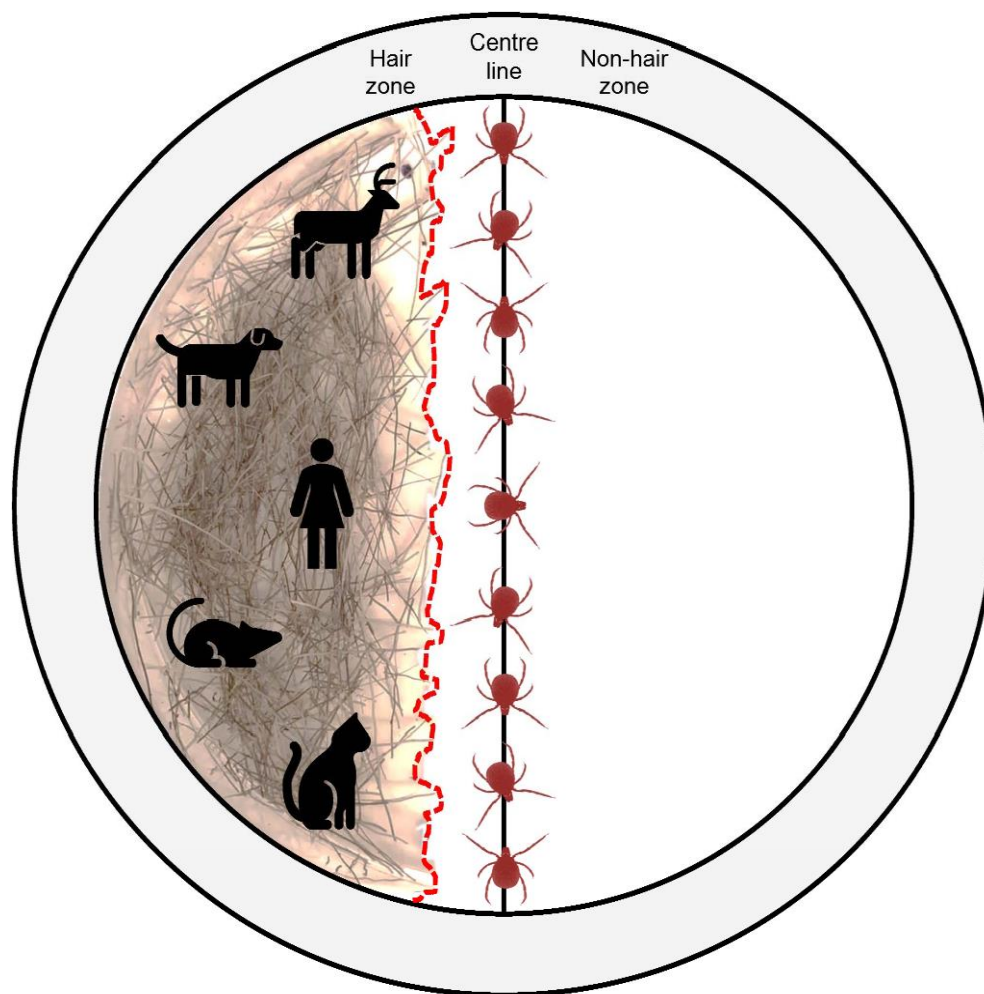

**Figure 1.** Diagram of behavioural assay arena. Petri dish (150 mm x 15 mm) divided into three zones: centre line, hair zone, and non-hair zone. The host hair (white-footed mouse, cat, dog, white-tailed deer, and human) was placed in the hair zone and formed an irregular hair interface (dashed line). At the start of the behavioural assay *Haemaphysalis longicornis* or *Ixodes scapularis* larvae ( $n = 10$ ) were placed on the centre line, assays were replicated three times for each hair treatment.

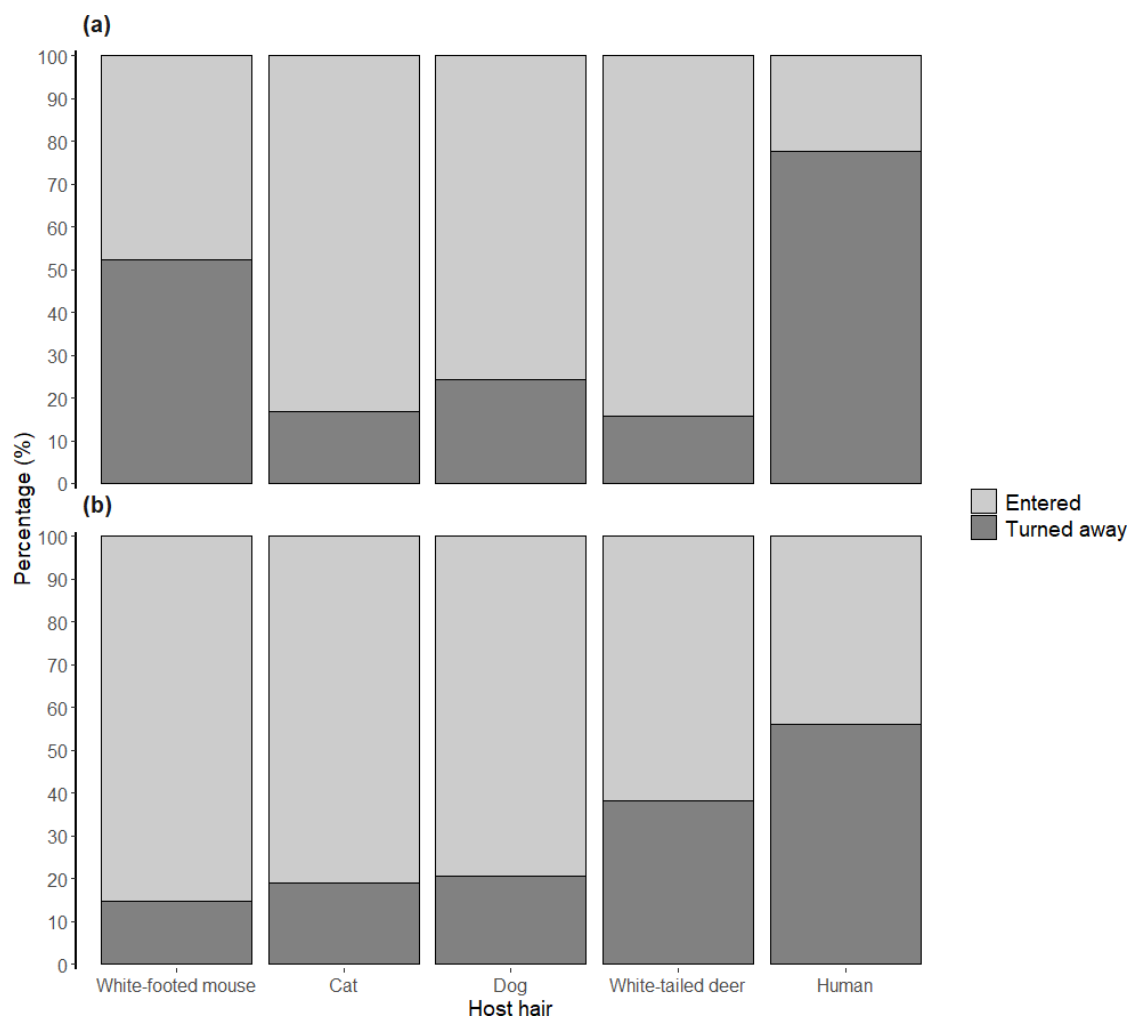

**Figure 2.** The percentage of ticks that, on interaction with the interface of the host hair (white-footed mouse, cat, dog, white-tailed deer, and human), either entered the hair zone or turned away from the interface for (a) *Haemaphysalis longicornis* larvae and (b) *Ixodes scapularis* larvae.

We observed that when a tick interacted with the hair interface they raised their front legs (the location of the sensory Haller's organ [13]) and waved them (supplementary material, movie 1 & 2). After each interaction, the tick decided to either enter the host hair zone or turn away from the hair interface. We used this decision by the ticks as a behavioural metric.

*H. longicornis* larvae were significantly less likely to enter the host hair zone compared to *I. scapularis* larvae (GLMM,  $p = 0.0365$ , figure 2, table 1). We then analysed the behaviour within each tick species. *H. longicornis* larvae were significantly more likely to enter the hair zone of cats, dogs, or white-tailed deer than the hair zone of white-footed mice ( $p = 0.0095$ ;  $p = 0.0261$ ; and  $p = 0.0039$ ; respectively, figure 2a, table 1). In addition, *H. longicornis* larvae were as likely to enter the hair zone of humans as the hair zone of white-footed mice ( $p = 0.1645$ , figure 2a, table 1). *I. scapularis* larvae were significantly more likely to enter the hair zone of white-footed mice than the hair zone of white-tailed deer, or humans ( $p = 0.0447$ ; and  $p = 0.0021$ ; respectively, figure 2b, table 1). In addition, *I. scapularis* larvae were as likely to enter the hair zone of white-footed mice as the hair zone of cats or dogs ( $p = 0.3415$ ; and  $p = 0.4094$ ; respectively, figure 2b, table 1). Overall *H. longicornis* larvae spent significantly less time within the hair zone of each hair treatment compared to *I. scapularis* larvae ( $p = 0.0040$ ).

## Discussion

We observed that host-seeking *H. longicornis* larvae exhibited aversion to the hair of white-footed mice. Our finding indicates that this newly invasive tick is unlikely to select the white-footed mouse as a host in the natural environment of the USA. The findings of our laboratory-based study help explain why the recent USA passive and active field studies of *H. longicornis* did not find *H. longicornis* of any life stage on white-footed mice, despite collection of host-seeking *H. longicornis* ticks in the same regions [3, 11]. The aversion of *H. longicornis* to the white-footed mouse means there is a lower likelihood for them to be a vector of the most important tick-borne pathogens (such as *B. burgdorferi*, *Babesia microti* and *Anaplasma phagocytophilum*) in the USA, for which white-footed mice are the main reservoir host [12].

There are two plausible explanations for why *H. longicornis* evolved an aversion to the white-footed mouse in their native range. First, mice may develop resistance to *H. longicornis* after one exposure [14] which results in a reduction in fitness for the ticks (detachment from host, prolonged duration for feeding on a host, impaired engorgement, lower egg clutch sizes, and moulting death [15]). Second, *H. longicornis* adults take large blood meals which can lead to exsanguination and death of the host [1]. Small mammals are therefore likely to die before the ticks can fully engorge which reduces the fitness of the ticks.

Our findings that larval *H. longicornis* are more likely to enter the hair zone of medium and large sized mammals is consistent with field studies of *H. longicornis* [3, 11]. Medium-sized mammals have intermediate competence for tick-borne pathogens [7] and it is currently unknown whether medium-sized mammals can serve as a source of pathogens for *H. longicornis* in the USA. In addition, we found larval *H. longicornis* have an aversion for human hair. Notably, there are only two cases so far reported of *H. longicornis* biting a human in the USA [3].

**Table 1. GLMM of *Haemaphysalis longicornis* larvae and *Ixodes scapularis* larvae.** The number of interactions (*n*) with the interface of the host hair (white-footed mouse, cat, dog, white-tailed deer, and human), calculated odds ratio, and p-value. Each treatment was compared to the white-footed mouse (reference). (\*)  $P < 0.05$  and (\*\*)  $P < 0.01$ .

| <b>Treatment</b>   | <b><i>Haemaphysalis longicornis</i></b> |                   |                       | <b><i>Ixodes scapularis</i></b> |                   |                       |
|--------------------|-----------------------------------------|-------------------|-----------------------|---------------------------------|-------------------|-----------------------|
|                    | <b><i>n</i></b>                         | <b>Odds Ratio</b> | <b><i>P</i>-value</b> | <b><i>n</i></b>                 | <b>Odds Ratio</b> | <b><i>P</i>-value</b> |
| White-footed mouse | 37                                      | 1                 | -                     | 33                              | 1                 | -                     |
| Cat                | 23                                      | 5.0901            | 0.0096**              | 8                               | 0.5537            | 0.3415                |
| Dog                | 41                                      | 3.1535            | 0.0261*               | 34                              | 0.5915            | 0.4094                |
| White-tailed deer  | 22                                      | 6.9331            | 0.0039**              | 22                              | 0.2830            | 0.0447*               |
| Human              | 29                                      | 0.4616            | 0.1645                | 25                              | 0.1381            | 0.0021**              |

On physical contact with a passing potential host, a tick must make an instantaneous decision whether or not to attach to the host and subsequently feed. How different tick species detect and then select their host is currently not well understood [13]. Host stimuli such as body heat and carbon dioxide are not species specific so likely unhelpful for host selection. Our study has identified that ticks have a unique hair interaction behaviour (decide to enter the host hair or turn away at the hair interface), which suggests that they utilise a species-specific property of the animal hair to select their host. Furthermore, a behavioural assay that utilises host hair could provide a measure of potential tick-host associations that do not yet occur in nature, such as newly invasive ticks or ticks expanding their geographic range.

In conclusion, our study finds that the newly invasive *H. longicornis* has an aversion to the white-footed mouse, the dominant reservoir of tick-borne pathogens in the USA. Pathogen transmission studies therefore need to consider not only attraction of a vector to a host but also host aversion.



## **Acknowledgments**

We wish to thank Kevin Zhao and Daniel Mathisson for assisting with video analysis and Pilar Fernandez for advice on data analysis. In addition, thanks to Thomas Hart who provided the deer hair and the pets (Venus, Luna, and Lucy) who contributed their hair.

## **Funding**

This work was supported by an Australian Government Endeavour Research Fellowship to I.R. and the Centers for Disease Control and Prevention (Cooperative Agreement Number U01CK000509-01). Its contents are solely the responsibility of the authors and do not necessarily represent the official views of the Centers for Disease Control and Prevention or the Department of Health and Human Services.

## References

1. Hoogstraal H., Roberts F.H., Kohls G.M., Tipton V.J. 1968 Review of *Haemaphysalis* (Kaiseriana) longicornis Neumann (resurrected) of Australia, New Zealand, New Caledonia, Fiji, Japan, Korea, and northeastern China and USSR, and its parthenogenetic and bisexual populations (Ixodoidea, Ixodidae). *The Journal of parasitology*, 1197-1213.
2. Rainey T., Occi J.L., Robbins R.G., Egizi A. 2018 Discovery of *Haemaphysalis longicornis* (Ixodida: Ixodidae) Parasitizing a Sheep in New Jersey, United States. *J Med Entomol* 55(3), 757–759. (doi:10.1093/jme/tjy006).
3. United States Department of Agriculture. 2019 National *Haemaphysalis longicornis* (Asian longhorned tick) Situation Report. [http://www.aphis.usda.gov/animal\\_health/animal\\_diseases/tick/downloads/longhorned-tick-sitrep.pdf](http://www.aphis.usda.gov/animal_health/animal_diseases/tick/downloads/longhorned-tick-sitrep.pdf).
4. Beard C.B., Occi J., Bonilla D.L., Egizi A.M., Fonseca D.M., Mertins J.W., Backenson B.P., Bajwa W.I., Barbarin A.M., Bertone M.A., et al. 2018 Multistate Infestation with the Exotic Disease–Vector Tick *Haemaphysalis longicornis*—United States, August 2017–September 2018. *MMWR Morbidity and mortality weekly report* 67.
5. The Centers for Disease Control and Prevention. 2019 What you need to know about Asian longhorned ticks - A new tick in the United States. <https://www.cdc.gov/ticks/longhorned-tick/index.html>.
6. Rochlin I. 2018 Modeling the Asian Longhorned Tick (Acari: Ixodidae) Suitable Habitat in North America. *J Med Entomol* 56(2), 384–391. (doi:10.1093/jme/tjy210).
7. LoGiudice K., Ostfeld R.S., Schmidt K.A., Keesing F. 2003 The ecology of infectious disease: Effects of host diversity and community composition on Lyme disease risk. *Proceedings of the National Academy of Sciences* 100(2), 567-571. (doi:10.1073/pnas.0233733100).
8. Lane R., Piesman J., Burgdorfer W. 1991 Lyme borreliosis: relation of its causative agent to its vectors and hosts in North America and Europe. *Annu Rev Entomol* 36(1), 587-609.
9. Heath A.C.G. 2016 Biology, ecology and distribution of the tick, *Haemaphysalis longicornis* Neumann (Acari: Ixodidae) in New Zealand. *N Z Vet J* 64(1), 10-20. (doi:10.1080/00480169.2015.1035769).
10. Kim C.-M., Yi Y.-H., Yu D.-H., Lee M.-J., Cho M.-R., Desai A.R., Shringi S., Klein T.A., Kim H.-C., Song J.-W., et al. 2006 Tick-Borne Rickettsial Pathogens in Ticks and Small Mammals in Korea. *Appl Environ Microbiol* 72(9), 5766-5776. (doi:10.1128/aem.00431-06).
11. Tufts D.M., VanAcker M.C., Fernandez M.P., DeNicola A., Egizi A., Diuk-Wasser M.A. 2019 Distribution, Host-Seeking Phenology, and Host and Habitat Associations of *Haemaphysalis longicornis* Ticks, Staten Island, New York, USA. *Emerg Infect Dis* 25(4), 792. (doi:10.3201/eid2504.181541).
12. Petersen L.R., Beard C.B., Visser S.N. 2019 Combatting the Increasing Threat of Vector-Borne Disease in the United States with a National Vector-Borne Disease Prevention and Control System. *The American Journal of Tropical Medicine and Hygiene* 100(2), 242-245. (doi:<https://doi.org/10.4269/ajtmh.18-0841>).
13. Carr A.L., D Mitchell III R., Dhammi A., Bissinger B.W., Sonenshine D.E., Roe R.M. 2017 Tick Haller’s Organ, a New Paradigm for Arthropod Olfaction: How Ticks Differ from Insects. *International journal of molecular sciences* 18(7), 1563.
14. Matsuda H., Fukui K., Kiso Y., Kitamura Y. 1985 Inability of genetically mast cell-deficient W/W<sup>m</sup> mice to acquire resistance against larval *Haemaphysalis longicornis* ticks. *The Journal of parasitology* 71(4), 443-448.
15. Kovář L. 2004 Tick saliva in anti-tick immunity and pathogen transmission. *Folia Microbiol (Praha)* 49(3), 327-336. (doi:10.1007/bf02931051).
