# Supplementary material for: Aversion of the invasive Asian longhorned tick to the white-footed mouse, the dominant reservoir of tick-borne pathogens in the United States
Source: bioRxiv or medRxiv preprint supplement (doi:10.1101/826289), 2019-11-09
Supplement: Supplementary file [file media-1.pdf]

## Supplementary material

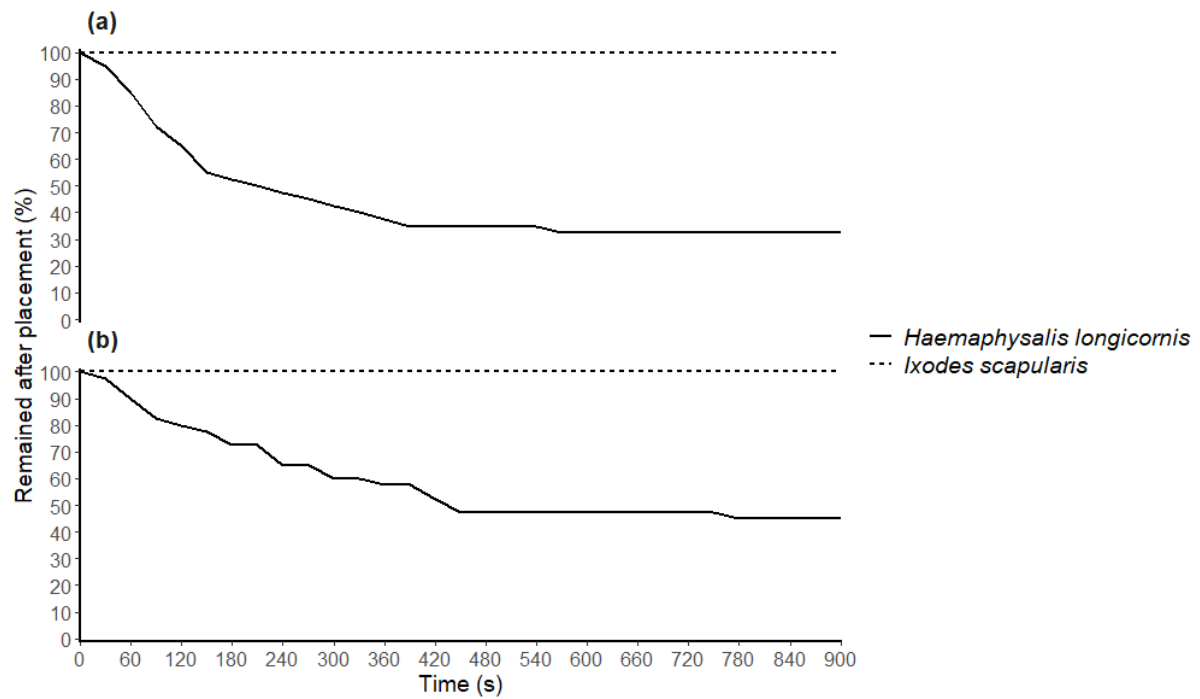

**Figure 1.** Percentage of *Haemaphysalis longicornis* ( $n = 40$ ) or *Ixodes scapularis* ( $n = 30$ ) larvae that remained after placement (time 0) on the (a) ear of the mouse and (b) mouse.

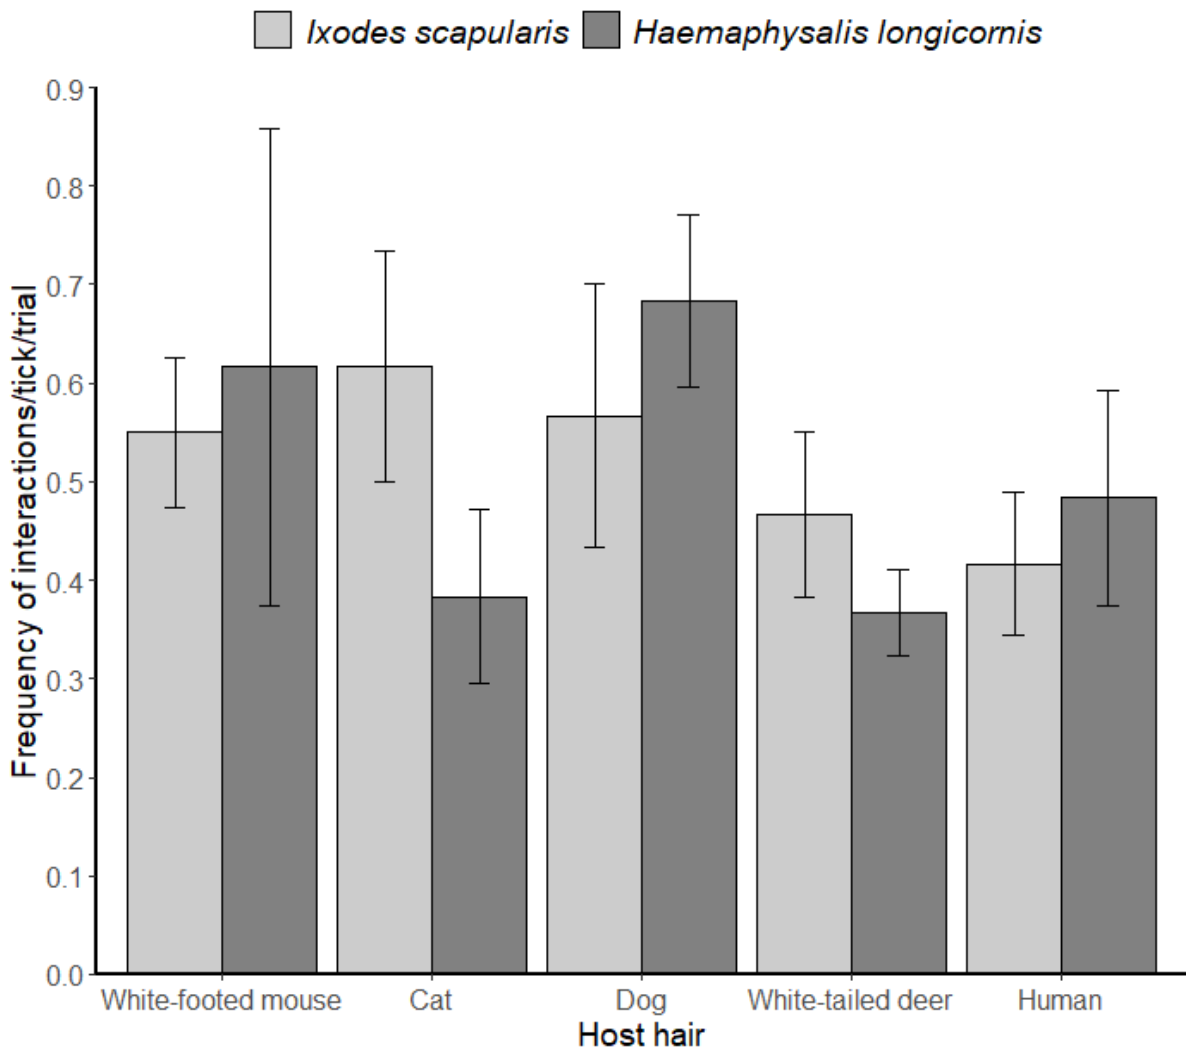

**Figure 2.** Number of interactions a larval tick (*Haemaphysalis longicornis* or *Ixodes scapularis*,  $n = 30$ ) made with the interface of the host hair (white-footed mouse, cat, dog, white-tailed deer, and human) per trial.
